# Supplementary material
Source: Springer Nature journal article supplement (https://www.springermedizin.de/resource/supplementary/12879_2012_2931_MOESM1_ESM.pdf/9445400)
Supplement: MOESM1 [file 9445400]

293 Patients with asthma attacks in emergency department assessed for eligibility

22 Did not meet inclusion criteria  
2 Death before inclusion  
4 No informed consent

265 Randomized

132 Assigned to PCT group

133 Assigned to control group

1 Died  
1 Withdraw from study  
2 Lost to follow-up

2 Died  
1 Withdraw from study  
3 Lost to follow-up

128 Completed follow-up at 6 weeks

127 Completed follow-up at 6 weeks assigned to PCT group
